# Supplementary material for: Quantitative Distribution and Transmission of Tea Plant Necrotic Ring Blotch Virus in Camellia sinensis
Source: MDPI journal article supplement (doi:10.3390/f13081306), 2022-08-16
Supplement: s1 [file s1]

Archive with 3 entries (3 files):
- Supplementary Figures.pdf
- Supplementary Table S3.xls
- Supplementary Tables.pdf
