# Supplementary material for: Quantitative Distribution and Transmission of Tea Plant Necrotic Ring Blotch Virus in Camellia sinensis
Source: MDPI journal article supplement (doi:10.3390/f13081306), 2022-08-16

Supplementary Figure S1. Schematic diagram of agarose gel electrophoresis of the inserted sequences of TPNRBV.

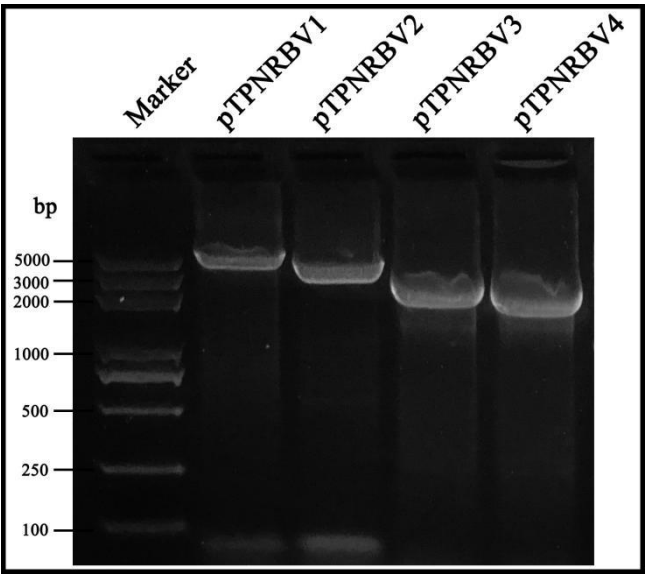

Supplementary Figure S2. Melting curves of TPNRBV plasmid by RT-qPCR.

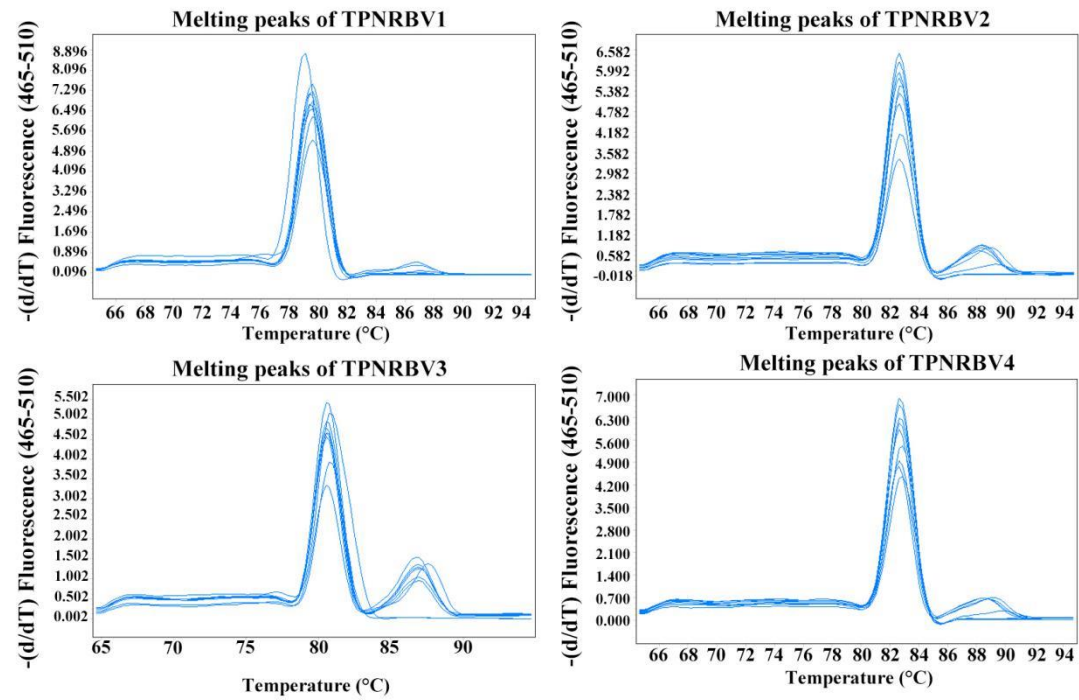

Supplementary Figure S3. Amplification curves of TPNRBV plasmid by RT-qPCR.

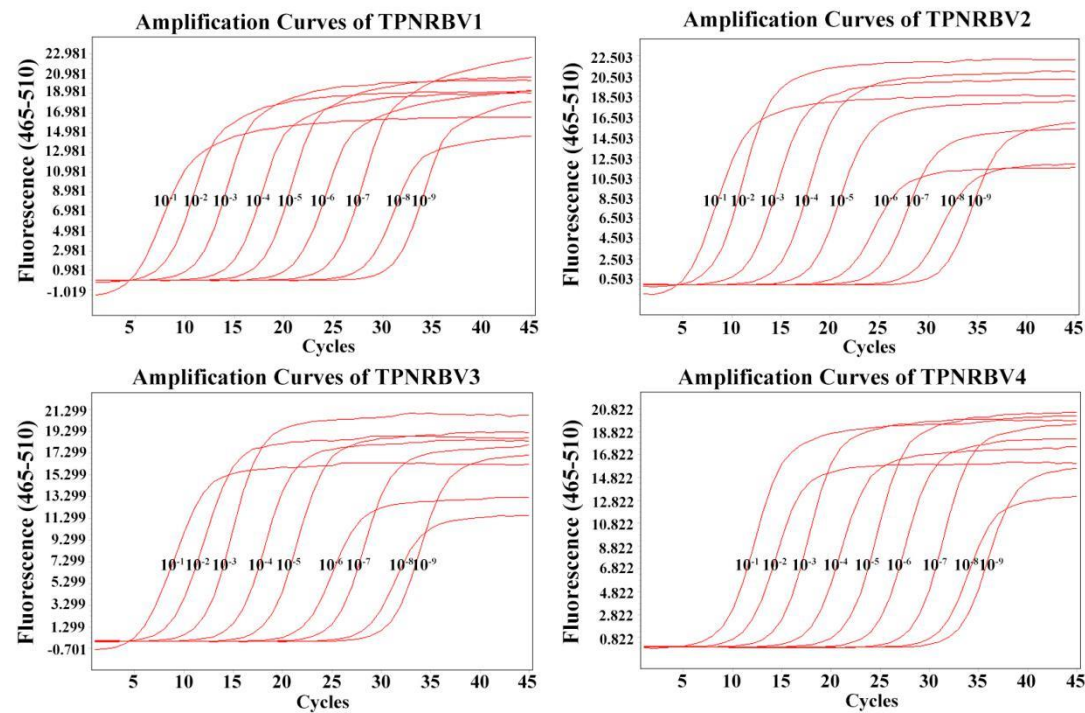

Supplement: s1 [file s1]
