# Supplementary material for: Quantitative Distribution and Transmission of Tea Plant Necrotic Ring Blotch Virus in Camellia sinensis
Source: MDPI journal article supplement (doi:10.3390/f13081306), 2022-08-16
Supplement: s1 [file s1]

**Supplementary Table S1. Primers used for the construction of recombinant plasmid containing cDNA clones of TPNRBV**

| Primers name  | Primer sequence (5'-3')                                                      |
|---------------|------------------------------------------------------------------------------|
| TPNRBV2-F1    | TTAGCAATTACCGCTGGTATTG                                                       |
| TPNRBV2-MR1   | GAGGCTTATACTTCGACAACACT                                                      |
| TPNRBV2-MF2   | GGTCCATACGTGTCAAATCTGAT                                                      |
| TPNRBV2-R2    | GTTATCTTACTAAATCTAGACTAA                                                     |
| TPNRBV3-F     | TTGCGGTCAGTTGGCCGTTT                                                         |
| TPNRBV3-R     | ATCTTATTAATATTAGGTTATGACA                                                    |
| TPNRBV4-F     | TTACCTTTGCGTAGGCATTGGT                                                       |
| TPNRBV4-R     | ATCTTATAATATTAAGTCATGACATA                                                   |
| 35S-TPNRBV1-F | <u>TAACAATTTACACAGGAAACAGCTATGACCATGATTACGTGAGACTTTTCAACA</u><br>AAGGGTAA    |
| TPNRBV1-35S-R | <u>CCTGTAATTCACACGTCGACTCTAGAGGATCCCCGGGTAC</u> ATCTTAATAATCTAG<br>ACTATGACA |
| 35S-F         | <u>ACACAGGAAACAGCTATGACCATGATTACGTGAGACTTTTCAACAAAGGGTAA</u>                 |
| TPNRBV2-35S-R | <u>ACACGTCGACTCTAGAGGATCCCCGGGTAC</u> GTTATCTTACTAAATCTAGACTAAA              |
| TPNRBV3-35S-R | <u>AGGATCCCCGGGTAC</u> ATCTTATTAATATTAGGTTATGACAT                            |
| TPNRBV4-35S-R | <u>AGGATCCCCGGGTAC</u> ATCTTATAATATTAAGTCATGACATA                            |

Sequences with a single underline indicate the added restriction endonuclease site sequence, while the double underlined sequences indicate the homologous region with pCAMBIA1300.

**Supplementary Table S2. RT-qPCR primer sequences**

| Primers name | Primer sequence (5'-3')  | Production length |
|--------------|--------------------------|-------------------|
| qTPNRBV1-F   | TGTGCGACGGACTCATTCTC     | 183               |
| qTPNRBV1-R   | TCAAGCATGCGAGTTTCCCT     |                   |
| qTPNRBV2-F   | CCCGTCATCGATACGCTCAA     | 167               |
| qTPNRBV2-R   | TACCTGGGGGAAGGTCTGAA     |                   |
| qTPNRBV3-F   | GATCGTCCTTCCCGATCTGC     | 161               |
| qTPNRBV3-R   | GTGCAGGCGTTCGCTTATTG     |                   |
| qTPNRBV4-F   | TTGGTTCGCTGTCCACCATT     | 171               |
| qTPNRBV4-R   | GAGCTGAAGCTGACGCATGA     |                   |
| CsPTB-F      | ACCAAGCACACTCCACACTATCG  | 105               |
| CsPTB-R      | TGCCCCCTTATCATCATCCACAA  |                   |
| CsEF1-F      | TTGGACAAGCTCAAGGCTGAACG  | 110               |
| CsEF1-R      | ATGGCCAGGAGCATCAATGACAGT |                   |
