# Supplementary material for: Quantitative Distribution and Transmission of Tea Plant Necrotic Ring Blotch Virus in Camellia sinensis
Source: MDPI journal article supplement (doi:10.3390/f13081306), 2022-08-16
Supplement: s1 [file s1 › Supplementary Table S3.xls]

## Sheet: Ct values of Samples
Supplementary Table S3. Raw Ct values of all samples
	Templates	Ct value of CsPTB	Ct value of CsEF1	Ct value of TPNRBV1	Ct value of TPNRBV2	Ct value of TPNRBV3	Ct value of TPNRBV4
Spring	Top buds−1	23.05	18.11	40	31.46	31.62	40
	Top buds−1	23.04	17.9	40	33.7	31.92	−
	Top buds−2	22.89	17.69	32.08	28.16	27.91	36.72
	Top buds−2	22.94	17.62	32.71	27.89	27.67	34.62
	Top buds−3	23.73	18.11	34.27	35.72	32.25	35.97
	Top buds−3	23.67	18.11	34.01	−	32.87	36.15
	The first upper leaves−1	22.96	18.3	35.51	33.86	30.56	33.22
	The first upper leaves−1	23.06	18.1	−	33.21	30.82	32.51
	The first upper leaves−2	23.91	19.17	−	34.17	33.74	40
	The first upper leaves−2	23.9	19.19	−	40	33.16	40
	The first upper leaves−3	22.84	16.97	40	40	33.18	39.3
	The first upper leaves−3	22.7	17.88	34.07	40	33.58	37.07
	The second upper leaves−1	24.01	19.02	32.75	40	30.73	35.64
	The second upper leaves−1	23.49	18.79	−	40	31.65	33.86
	The second upper leaves−2	22.8	18.52	32.05	32.69	29.73	32.59
	The second upper leaves−2	22.83	17.94	31.82	32.3	29.2	32.5
	The second upper leaves−3	23.45	19.01	34.82	40	31.87	38.8
	The second upper leaves−3	23.24	18.92	40	33.57	31.5	40
	Asymptomatic mature leaves formed previous year−1	22.6	19.95	35.16	30.75	32.75	37.05
	Asymptomatic mature leaves formed previous year−1	22.18	19.68	33.61	30.92	34.01	37.36
	Asymptomatic mature leaves formed previous year−2	20.84	18.78	21.43	20.49	17.8	18.5
	Asymptomatic mature leaves formed previous year−2	20.31	18.46	21.64	20.2	17.75	18.08
	Asymptomatic mature leaves formed previous year−3	21.89	19.27	21.79	20.74	17.52	21.47
	Asymptomatic mature leaves formed previous year−3	21.21	19.28	21.15	20.59	17.49	21.28
	Symptomatic diseased mature leaves−1	24.61	22.8	17.54	17.44	14.31	15.93
	Symptomatic diseased mature leaves−1	24.8	22.49	16.94	17.19	14.23	16.02
	Symptomatic diseased mature leaves−2	23.43	22.26	18.42	25.43	16.28	19.87
	Symptomatic diseased mature leaves−2	23.54	22.56	17.94	25.48	16.46	19.42
	Symptomatic diseased mature leaves−3	22.2	19.06	15.04	14.34	11.74	15.01
	Symptomatic diseased mature leaves−3	21.52	19.01	14.44	14.44	11.78	14.98
	Green young stems−1	23.89	19.09	−	33.86	32.79	40
	Green young stems−1	24.88	19.13	−	35.32	31.94	40
	Green young stems−2	22.81	18.09	33.19	40	32.45	34.69
	Green young stems−2	22.8	18.25	34.08	35.29	32.15	40
	Green young stems−3	20.74	16.49	36.16	35.19	30.24	34.26
	Green young stems−3	20.55	16.49	34.28	32.9	30.75	33.57
	Brown old stems−1	21.55	18.91	23.8	23.01	19.45	23.42
	Brown old stems−1	21.17	18.55	23.61	22.99	20.94	23.29
	Brown old stems−2	22.5	19.78	30.73	28.52	26.93	30.63
	Brown old stems−2	21.85	19.75	30.76	29.16	26.96	30.66
	Brown old stems−3	22.83	19.98	33.65	33.47	30.11	31.9
	Brown old stems−3	22.08	19.89	33.44	34.05	29.78	31.56
	Roots−1	23.04	20.82	33.64	30.87	29.15	33.16
	Roots−1	23.1	−	33.03	31.96	28.75	32.64
	Roots−2	22.08	20.19	36.25	33.05	30.27	40
	Roots−2	21.34	19.27	32.99	32.84	30.84	33.19
	Roots−3	24.22	20.52	35.21	35.27	31.05	33.65
	Roots−3	23.91	20.47	34.48	34.02	32.09	34.96
Summer	Top buds−1	21.33	17.78	40	40	32.76	39.37
	Top buds−1	21.11	17.94	38.47	35.1	34.61	40
	Top buds−2	21.16	17.09	40	40	32.46	40
	Top buds−2	20.79	17.04	40	40	34.18	40
	Top buds−3	20.72	17.05	40	40	33.71	40
	Top buds−3	21.16	17.47	40	40	32.71	40
	The first upper leaves−1	21.19	17.94	35.5	33.73	31.46	38.28
	The first upper leaves−1	20.63	18.22	32.49	33.83	31.83	35.33
	The first upper leaves−2	20.98	17.52	30.42	30.66	28.19	33.83
	The first upper leaves−2	20.23	17.6	29.9	31.16	29	35.96
	The first upper leaves−3	20.08	17.06	33.11	33.3	31.46	40
	The first upper leaves−3	19.94	17.2	32.46	32.75	32.42	37.45
	The second upper leaves−1	21.33	19.13	33.74	40	33.58	36.39
	The second upper leaves−1	20.94	19.23	35.43	40	31.99	40
	The second upper leaves−2	21.8	19	28.75	28.6	27.89	33.15
	The second upper leaves−2	21.82	19.48	28.1	28.49	28.54	32.56
	The second upper leaves−3	21.5	19.16	33.23	33.35	32.69	39.97
	The second upper leaves−3	21.15	19.48	33.19	33.98	33
	Asymptomatic mature leaves formed in current year−1	22.23	20.02	40	−	33.27	40
	Asymptomatic mature leaves formed in current year−1	21.79	20.48	40	−	−	−
	Asymptomatic mature leaves formed in current year−2	22.48	19.21	34.54	40	32.99	40
	Asymptomatic mature leaves formed in current year−2	21.68	20.24	35.32	−	36.59	40
	Asymptomatic mature leaves formed in current year−3	21.66	23.15	33.76	32.72	33.43	39.55
	Asymptomatic mature leaves formed in current year−3	21.07	21.03	40	34.54	34.48	38.39
	New unfolded leaves−1	22.07	16.57	31.17	31.03	27.79	29.03
	New unfolded leaves−1	22.3	16.78	30.83	31.31	27.63	29.11
	New unfolded leaves−2	23.45	17.88	18.64	17.63	16.15	20.76
	New unfolded leaves−2	23.65	18.1	18.46	17.66	15.97	20.62
	New unfolded leaves−3	22.16	16.78	31.77	33	30.82	32.89
	New unfolded leaves−3	21.89	16.75	32.56	33.28	30.64	32.7
	Symptomatic diseased mature leaves−1	22.27	16.71	18.06	18.66	15.65	18.6
	Symptomatic diseased mature leaves−1	22.08	16.55	17.47	18.47	15.46	18.6
	Symptomatic diseased mature leaves−2	22.54	16.94	17.94	17.67	14.44	18.11
	Symptomatic diseased mature leaves−2	22.59	16.79	17.69	17.48	14.17	17.93
	Symptomatic diseased mature leaves−3	21.99	16.66	17.73	17.53	15.65	18.17
	Symptomatic diseased mature leaves−3	22.07	18.19	18.11	17.35	15.32	17.79
	Green young stems−1	21.45	16.22	40	35.52	33.02	40
	Green young stems−1	21.25	15.82	40	40	33.01	37.69
	Green young stems−2	21.05	15.93	40	40	32.25	39.33
	Green young stems−2	21.26	15.24	35.28	40	33.08	40
	Green young stems−3	21.6	15.83	34.23	34.3	31.77	34.97
	Green young stems−3	21.48	15.67	35.29	35.3	31.47	35.28
	Brown old stems−1	24.43	20.93	38.88	40	32.63	34.88
	Brown old stems−1	24.25	−	36.59	37.35	34.47	40
	Brown old stems−2	22.95	18.13	28.68	27.81	26.47	26.18
	Brown old stems−2	22.53	18.07	28.03	26.99	25.96	26.57
	Brown old stems−3	24.49	20.44	40	40	33.93	40
	Brown old stems−3	24.18	20.02	38.16	40	32.94	40
	Roots−1	24	16.45	40	40	31.96	40
	Roots−1	23.89	16.09	35.66	−	33.8	38.39
	Roots−2	25.99	17.91	40	40	34.28	38.3
	Roots−2	25.74	17.57	39.06	−	32.75	40
	Roots−3	23.55	15.76	37.8	35.32	32.61	35.03
	Roots−3	23.73	15.76	38.5	40	33.15	35.44
Autumn	Top buds−1	24.7	22.48	−	34.8	31.86	38.41
	Top buds−1	24.34	22.32	−	−	32.99	37.17
	Top buds−2	24.89	19.86	40	−	32.69	40
	Top buds−2	24.75	19.67	−	−	33.56	38.28
	Top buds−3	23.51	20.06	−	35.28	34.98
	Top buds−3	24.21	20.87	40	−	35.57
	The first upper leaves−1	23.82	20.12	32.76	34.55	29.32	32.46
	The first upper leaves−1	24.08	19.63	33.28	35.3	30.58	32.7
	The first upper leaves−2	24.73	20.68		−	34.3	40
	The first upper leaves−2	24.93	20.79	35.84	−	35.92	40
	The first upper leaves−3	24.93	21.99	34.47	−	33.18	40
	The first upper leaves−3	24.72	22.03		40	34.77
	The second upper leaves−1	25.45	21.6	35.22	−	30.59	36.17
	The second upper leaves−1	25.22	21.43	−	−	30.81
	The second upper leaves−2	23.99	21.44	31.41	32.1	28.96	32.09
	The second upper leaves−2	24.44	20.74	31.3	32.03	28.66	32.03
	The second upper leaves−3	24.88	21.53	35.19	40	32.53	40
	The second upper leaves−3	24.63	21.46	33.94	−	33.03	37.67
	Asymptomatic mature leaves formed in current year−1	23.68	20.75	40	−	32.64	40
	Asymptomatic mature leaves formed in current year−1	24.06	20.58	36.42	34.42	33.87	40
	Asymptomatic mature leaves formed in current year−2	23.91	19.94	35.46	−	33.69	40
	Asymptomatic mature leaves formed in current year−2	24.3	20.17	−	35.69	−	−
	Asymptomatic mature leaves formed in current year−3	24.26	20.46	33.31	35.28	33.29	−
	Asymptomatic mature leaves formed in current year−3	24.67	20.67	34.99	−	34.12	37.13
	Symptomatic diseased mature leaves−1	25.6	22.65	20.91	19.22	15.06	17.86
	Symptomatic diseased mature leaves−1	25.81	22.97	20.72	18.93	14.67	17.9
	Symptomatic diseased mature leaves−2	25.3	22.08	21.86	19.77	16.04	18.54
	Symptomatic diseased mature leaves−2	25.82	22.72	22.02	19.67	15.51	18.07
	Symptomatic diseased mature leaves−3	23.21	18.8	19.68	17.62	13.98	16.27
	Symptomatic diseased mature leaves−3	23.45	18.93	19.48	17.52	13.52	15.94
	Flowers−1	23.3	19.29	29.62	27.48	23.84	26.18
	Flowers−1	23.12	19.04	29.84	27.3	23.49	26.51
	Flowers−2	24.59	21.61	−	−	33.63	40
	Flowers−2	25.21	21.46	−	−	32.63	35.08
	Flowers−3	24.2	20.77	−	35.29	33.12	40
	Flowers−3	24.27	20.31	39.5	34.14	32.5	40
	Green young stems−1	25.05	20.56	−	−	32.54	35.07
	Green young stems−1	24.62	20.33	−	−	32.7	35.78
	Green young stems−2	25.94	21.24	−	−	32.85	33.25
	Green young stems−2	25.87	20.96	−	33.29	31.46	34.59
	Green young stems−3	24.73	22.3	31.74	32.31	28.34	30.97
	Green young stems−3	24.66	22.11	31.87	33.09	28.1	30.84
	Brown old stems−1	26.04	24.58	39.33	40	33.34	37.18
	Brown old stems−1	25.65	23.13	35.18	35.44	32.25	34.8
	Brown old stems−2	27.25	24.68	34.41	34.35	−	34.73
	Brown old stems−2	26.84	19.83	35.31	34.55	32.85	33.79
	Brown old stems−3	24.47	21.2	35.3	40	33.88	34.08
	Brown old stems−3	23.98	21.17	40	33.6	32.52	33.77
	Roots−1	25.22	22.19	40	35.42	35.49
	Roots−1	24.82	21.98	40	35.2	33.66	40
	Roots−2	26.43	22.61	40	−	32.66	36.39
	Roots−2	26.76	23.1	40	−	33.62	37.66
	Roots−3	27.23	23.5	38.54	39.5	33.56
	Roots−3	27.09	24.13	40	35.29	32.85
2019.12.27	Symptomatic area of diseased mature leaves−1	24.01	18.92	16.84	18.12	13.7	16.46
	Symptomatic area of diseased mature leaves−1	24.13	19.47	17.46	18.37	13.66	16.51
	Symptomatic area of diseased mature leaves−2	23.2	18.25	16.19	17.21	13.22	15.74
	Symptomatic area of diseased mature leaves−2	23.44	18.23	16.23	17.33	13.66	16.03
	Symptomatic area of diseased mature leaves−3	23.65	19.48	19.79	19.78	14.52	18.61
	Symptomatic area of diseased mature leaves−3	23.7	19.18	20.47	19.56	14.97	18.12
	Asymptomatic area of diseased mature leaves−1	24.26	19.18	26.02	25.07	24.12	24.37
	Asymptomatic area of diseased mature leaves−1	24.18	19.57	26.75	26.3	25	24.49
	Asymptomatic area of diseased mature leaves−2	23.49	18.95	25.22	23.88	24.17	24.02
	Asymptomatic area of diseased mature leaves−2	23.82	18.62	24.71	24.54	23.45	23.64
	Asymptomatic area of diseased mature leaves−3	22.99	18.28	19.56	21.24	16.25	18.9
	Asymptomatic area of diseased mature leaves−3	22.82	18.41	19.67	20.45	16.73	18.56
Spring	New germinated seeds−1	22.05	19.42	−	−	31.53	−
	New germinated seeds−1	21.95	19.55	−	40	32.02	−
	New germinated seeds−2	21.74	19.43	−	−	31.68	−
	New germinated seeds−2	21.49	18.9	−	−	31.58	−
	New germinated seeds−3	21.56	18.27	−	−	31.11	40
	New germinated seeds−3	21.49	18.13	−	−	30.6	−
	New germinated seeds−4	21	17.8	−	35.51	31.62	−
	New germinated seeds−4	21.76	17.94	−	−	31.25	−
	New germinated seeds−5	21.12	18.33	−	−	30.98	−
	New germinated seeds−5	22.03	18.18	−	−	31.58	−
Autumn	Mature seeds−1	25.86	21.3	36.98	−	33.98	40
	Mature seeds−1	25.8	22.3	35.68	40	34.4	40
	Mature seeds−2	25.74	22.3	37.08	−	34.25	−
	Mature seeds−2	25.82	21.84	34.78	−	34.14	40
	Mature seeds−3	25.08	17.93	38.74	40	34.23	40
	Mature seeds−3	24.99	17.08	38.2	40	34.53	40
	Mature seeds−4	25.97	21.89	37.26	−	33.92	40
	Mature seeds−4	25.89	21.81	37.06	−	33.86	40
	Mature seeds−5	26.09	23.24	37.68	−	33.74	40
	Mature seeds−5	26.53	22.99	35.97	−	33.89	38.48
Mature leaves of the five tea cultivars before treatment	ZH1−1	21.29	18.61	40	−	32.6	40
	ZH1−1	21.68	18.63	38.82	−	33.21	40
	ZH1−2	21.29	17.82	31.96	−	33.75	40
	ZH1−2	21.74	18.31	31.27	−	32.27	40
	ZH1−3	21.73	17.15	32.06	−	33.82	40
	ZH1−3	21.23	17.83	32.5	40	33.31	40
	ZH2−1	23.04	18.28	32.3	−	32.83	40
	ZH2−1	22.85	18.82	33.61	−	32.65	−
	ZH2−2	21.55	16.61	38.1	−	33.03	40
	ZH2−2	21.24	17.07	35.32	40	32.59	40
	ZH2−3	21.18	15.96	31.22	−	31.91	40
	ZH2−3	21.25	16.48	31.2	−	32.6	40
	HJY−1	22.73	17.93	34.28	−	32.09	40
	HJY−1	22.5	18.1	40	−	32.8	40
	HJY−2	22.19	17.55	32.58	−	32.49	40
	HJY−2	22.34	17.48	31.97	40	32.25	40
	HJY−3	23.15	17.7	40	40	32.27	40
	HJY−3	23.15	17.98	40	40	31.79	36.67
	BY1−1	22.5	17.17	40	−	32.06	40
	BY1−1	21.96	16.91	40	40	32.52	40
	BY1−2	22.31	17.26	40	−	32.45	40
	BY1−2	22.75	16.46	40	−	32.43	40
	BY1−3	22.76	17.52	40	−	32.54	40
	BY1−3	22.45	17.56	40	−	32.46	40
	LJ43−1	21.7	18.48	40	40	32.58	40
	LJ43−1	21.97	17.78	40	−	32.61	40
	LJ43−2	21.7	17.67	40	40	32.32	40
	LJ43−2	21.78	18.78	40	40	31.62	40
	LJ43−3	21.62	17.97	40	40	31.69	40
	LJ43−3	21.73	17.18	40	35.47	32.87	37.87
	Lower mature leaves of ZH1−1	21.7	19.48	18.55	19.98	15.93	19.76
	Lower mature leaves of ZH1−1	21.79	19.55	18.29	20.25	15.9	19.98
	Lower mature leaves of ZH1−2	21.79	19.91	35.16	40	32.43	40
	Lower mature leaves of ZH1−2	21.65	19.68	−	40	32.29	40
	Lower mature leaves of ZH1−3	22.18	20.29	21.73	24.08	19.46	23.6
	Lower mature leaves of ZH1−3	22.46	20	21.46	24.59	19.15	23.43
	Upper new leaves of ZH1−1	21.51	18.43	40	−	32.17
	Upper new leaves of ZH1−1	21.55	18.72	−	−	32.09
	Upper new leaves of ZH1−2	21.99	19.19	40	40	32.08	37.29
	Upper new leaves of ZH1−2	22	19.2	−	−	31.59	40
	Upper new leaves of ZH1−3	22.2	19.06	−	−	32.1
	Upper new leaves of ZH1−3	22.31	19.71	−	40	31.78	40
	Lower mature leaves of ZH2−1	23.31	19.89	40	−	32.03	40
	Lower mature leaves of ZH2−1	23.79	20.08	40	−	31.48	40
	Lower mature leaves of ZH2−2	23.19	19.42	40	−	31.69	40
	Lower mature leaves of ZH2−2	23.45	19.43	40	−	31.86	40
	Lower mature leaves of ZH2−3	21.87	18.23	22.07	24.44	19.86	24.52
	Lower mature leaves of ZH2−3	21.43	18.54	21.99	24.48	19.67	23.89
	Upper new leaves of ZH2−1	21.82	17.42	33.1	−	30.87	34.77
	Upper new leaves of ZH2−1	21.03	17.05	32.08	−	30.29	34.7
	Upper new leaves of ZH2−2	21.13	17.07	40	40	32.56	40
	Upper new leaves of ZH2−2	21	17.18	40	−	31.89	40
	Upper new leaves of ZH2−3	21.35	17	40	40	32.44	40
	Upper new leaves of ZH2−3	21.16	17.05	40	−	32.46	40
	Lower mature leaves of HJY−1	21.46	18.88	33.97	35.5	30.64	36.93
	Lower mature leaves of HJY−1	20.8	18.5	40	35.33	29.69	34.32
	Lower mature leaves of HJY−2	20.97	18.63	32.6	33.15	29.43	34.69
	Lower mature leaves of HJY−2	20.45	18.27	33.43	32.82	29.05	36.13
	Lower mature leaves of HJY−3	20.61	18.26	24.5	25.65	22.03	27.77
	Lower mature leaves of HJY−3	20.94	18.09	24.86	25.76	21.57	27.57
	Upper new leaves of HJY−1	20.46	17.66	32.99	34.42	29.86	35.74
	Upper new leaves of HJY−1	20.47	17.02	34.55	33.53	29.51	36.76
	Upper new leaves of HJY−2	21.71	18.08	35.56	40	32.04	38.3
	Upper new leaves of HJY−2	21.11	17.82	35.2	40	31.01	40
	Upper new leaves of HJY−3	21.28	19.09	40	−	31.96	40
	Upper new leaves of HJY−3	21.7	18.93	40	−	31.9	35.43
	Lower mature leaves of BY1−1	24.66	18.45	34.49	35.64	32	37.77
	Lower mature leaves of BY1−1	24.19	18.48	40	−	31.59	36.51
	Lower mature leaves of BY1−2	25.8	19.65	40	−	33.86	40
	Lower mature leaves of BY1−2	25.64	19.32	40	−	33.14	40
	Lower mature leaves of BY1−3	24.98	18.67	40	35.44	32.97	37.99
	Lower mature leaves of BY1−3	24.63	18.97	38.88	−	33.1	40
	Upper new leaves of BY1−1	23.95	17.64	−	−	32.2	40
	Upper new leaves of BY1−1	23.91	17.27	−	−	33.01	40
	Upper new leaves of BY1−2	23.91	−	40	−	32.45	−
	Upper new leaves of BY1−2	23.9	−	40	−	32.45	40
	Upper new leaves of BY1−3	22.57	−	38.93	−	31.44	35.81
	Upper new leaves of BY1−3	23.42	16.02	40	−	32.93	37.7
	Lower mature leaves of LJ43−1	25.87	20.8	40	−	35.03	40
	Lower mature leaves of LJ43−1	26.01	21.09	40	−	34.84	40
	Lower mature leaves of LJ43−2	25.08	19.71	40	−	34.29	40
	Lower mature leaves of LJ43−2	25.52	19.76	40	−	34.08	40
	Lower mature leaves of LJ43−3	23.95	18.26	35.52	−	32.89	36.24
	Lower mature leaves of LJ43−3	24.23	18.58	40	−	32.68	37.91
	Upper new leaves of LJ43−1	23.33	16.51	40	−	32.56	40
	Upper new leaves of LJ43−1	23.67	−	40	−	31.67	40
	Upper new leaves of LJ43−2	23.84	16.76	40	−	31.1	40
	Upper new leaves of LJ43−2	23.9	−	−	−	31.44	40
	Upper new leaves of LJ43−3	24.08	−	40	−	31.61	40
	Upper new leaves of LJ43−3	24.12	16.56	40	−	32.05	40
	Leaves inoculated with TPNRBV−positive sap−1	23.29	18.31	40	40	32.12	40
	Leaves inoculated with TPNRBV−positive sap−1	23.44	18.53	40	35.3	32.2	40
	Leaves inoculated with TPNRBV−positive sap−2	23.16	18.63	33.26		30.82	35.44
	Leaves inoculated with TPNRBV−positive sap−2	23.61	18.73	33		31.31	34.99
	Leaves inoculated with TPNRBV−positive sap−3	21.71	17.58	−	35.24	31.52	40
	Leaves inoculated with TPNRBV−positive sap−3	21.98	18.59	40		31.65	40
	Leaves adjacent to TPNRBV−inoculated leaves−1	21.84	17.68	34.27	34.47	30.84	33.51
	Leaves adjacent to TPNRBV−inoculated leaves−1	22.26	−	34.56	−	30.92	33.18
	Leaves adjacent to TPNRBV−inoculated leaves−2	21.79	−	37.74	40	31.97	38.4
	Leaves adjacent to TPNRBV−inoculated leaves−2	22.14	17.45	40	40	31.6	40
	Leaves adjacent to TPNRBV−inoculated leaves−3	22.28	−	40	−	31.92	40
	Leaves adjacent to TPNRBV−inoculated leaves−3	22.54	17.7	40	−	31.98	40
	Leaves inoculated with TPNRBV−free sap−1	21.89	17.46	40	−	31.71	37.7
	Leaves inoculated with TPNRBV−free sap−1	21.56	−	40	40	32.09	38.01
	Leaves inoculated with TPNRBV−free sap−2	22.14	17.68	40	−	31.78	40
	Leaves inoculated with TPNRBV−free sap−2	21.87	17.54	40		32.34	40
	Leaves inoculated with TPNRBV−free sap−3	22.1	17.67	40	−	31.93	34.81
	Leaves inoculated with TPNRBV−free sap−3	21.71	17.45	−	40	32.27	36.41
	Leaves adjacent to TPNRBV−free sap inoculated leaves−1	22.94	18.9	40	40	31.81	−
	Leaves adjacent to TPNRBV−free sap inoculated leaves−1	22.56	−	40	40	32.2	38.21
	Leaves adjacent to TPNRBV−free sap inoculated leaves−2	22.56	17.98	40	40	33.43	40
	Leaves adjacent to TPNRBV−free sap inoculated leaves−2	22.6	18.07	40	−	33.45	40
	Leaves adjacent to TPNRBV−free sap inoculated leaves−3	22.98	18.46	40	−	33.77	40
	Leaves adjacent to TPNRBV−free sap inoculated leaves−3	24	−	40	−	32.66	−
	Leaves of uninoculated tea plants−1	20.98	17.09	37.78	−	32.56	−
	Leaves of uninoculated tea plants−1	21.11	−	40	−	32.03	40
	Leaves of uninoculated tea plants−2	21.68	17.53	40	40	31.74	−
	Leaves of uninoculated tea plants−2	21.89	−	39.3	40	32.83	40
	Leaves of uninoculated tea plants−3	21.94	17.66	40	−	32.57	40
	Leaves of uninoculated tea plants−3	22.06	17.71	40	40	32.29	36.39
	Sap from symptomatic diseased mature leaves−1	25.46	26.66	19.57	19.05	15.81	17.12
	Sap from symptomatic diseased mature leaves−1	25.65	21.48	19.09	19.36	15.31	17.46
	Note: The '−' symbol indicates that there are no valid values. The numbers of 1, 2 and 3 on the right of template name indicate biological replicates, and the same numbers indicate technical replicates. Ct with a value of 40 represents that the late Ct call (last five cycles) has higher uncertainty.
